# Supplementary figures and images for: Genetic and Physiological Dissection of Photosynthesis in Barley Exposed to Drought Stress
Source: MDPI journal article supplement (doi:10.3390/ijms20246341), 2019-12-16

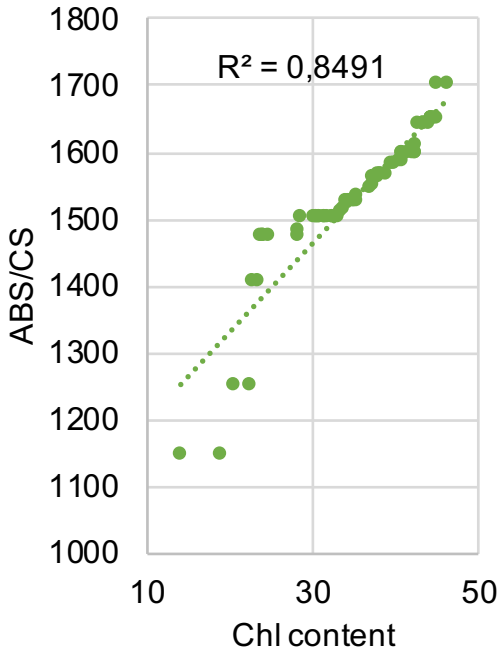

Supplement: s1 [file s1]
